# Supplementary material for: Emergence of Novel Chlamydia trachomatis Sequence Types among Chlamydia Patients in the Republic of Belarus
Source: MDPI journal article supplement (doi:10.3390/microorganisms10020478), 2022-02-21

**Supplemental Table S1.** Number of CT-positive patients among random cohort of patients from different Regions of the Republic of Belarus tested in PCR.

| Region         | Number of patients tested (n) |      |      |      |        |      | Number of CT-positive patients in PCR* (n) |     |      |      |        |      |
|----------------|-------------------------------|------|------|------|--------|------|--------------------------------------------|-----|------|------|--------|------|
|                | Total                         |      | Male |      | Female |      | Total                                      |     | Male |      | Female |      |
|                | Abs.                          | %    | Abs. | %    | Abs.   | %    | Abs.                                       | %   | Abs. | %    | Abs.   | %    |
| Brest Region   | 340                           | 30,9 | 74   | 21,8 | 266    | 78,2 | 29                                         | 8,5 | 2    | 2,7  | 27     | 10,4 |
| Minsk Region   | 210                           | 19,1 | 49   | 23,3 | 161    | 76,7 | 10                                         | 4,8 | 1    | 2,1  | 9      | 5,6  |
| Mogilev Region | 95                            | 8,7  | 22   | 23,2 | 73     | 76,8 | 6                                          | 6,3 | 0    | 0    | 6      | 8,2  |
| Grodno Region  | 76                            | 6,9  | 21   | 27,6 | 55     | 72,4 | 5                                          | 6,6 | 3    | 14,3 | 2      | 3,6  |
| Vitebsk Region | 94                            | 8,6  | 23   | 24,5 | 71     | 75,5 | 5                                          | 5,3 | 1    | 4,3  | 4      | 5,6  |
| Gomel Region   | 136                           | 12,4 | 28   | 20,6 | 108    | 79,4 | 3                                          | 2,2 | 0    | 0    | 3      | 2,8  |
| Minsk City     | 147                           | 13,4 | 34   | 23,1 | 113    | 76,9 | 5                                          | 3,4 | 0    | 0    | 5      | 4,4  |
| Total          | 1098                          | 100  | 251  | 22,9 | 847    | 77,1 | 63                                         | 5,7 | 7    | 2,8  | 56     | 6,6  |

\* AmpliSens® Chlamydia trachomatis-FRT PCR kits (Central Research Institute of Epidemiology, Moscow, Russia) were used for real-time PCR with DNA isolated from clinical specimens of chlamydia patients as described [4].

**Supplemental Table S2.** List of the *C. trachomatis* strains available in PubMLST database and used in this study.

| Id       | Isolate         | Country                | Region       | Year     | Gender | Age | Manifestations*<br>ST | ST      | gat<br>A | opp<br>A | hfl<br>X | gid<br>A | eno<br>A | hem<br>N | fum<br>C | Reference<br>/<br>Source |
|----------|-----------------|------------------------|--------------|----------|--------|-----|-----------------------|---------|----------|----------|----------|----------|----------|----------|----------|--------------------------|
|          |                 |                        |              |          |        |     |                       |         |          |          |          |          |          |          |          |                          |
| 446<br>4 | Belarus/5-38    | Republic of<br>Belarus | Brest Region | 201<br>8 | female | 34  | -                     | 27<br>1 | 3        | 1        | 1        | 5        | 4        | 2        | 3        | This<br>study            |
| 446<br>5 | Belarus/6-12    | Republic of<br>Belarus | Minsk Region | 201<br>7 | male   | 41  | -                     | 27<br>1 | 3        | 1        | 1        | 5        | 4        | 2        | 3        | This<br>study            |
| 446<br>6 | Belarus/327-38  | Republic of<br>Belarus | Brest Region | 201<br>8 | female | 31  | -                     | 27<br>2 | 3        | 3        | 1        | 2        | 4        | 2        | 3        | This<br>study            |
| 446<br>7 | Belarus/37/2-38 | Republic of<br>Belarus | Brest Region | 201<br>8 | female | 21  | -                     | 27<br>3 | 3        | 1        | 2        | 5        | 3        | 2        | 3        | This<br>study            |
| 446<br>8 | Belarus/57/2-38 | Republic of<br>Belarus | Brest Region | 201<br>8 | female | 25  | -                     | 27<br>4 | 3        | 4        | 1        | 5        | 4        | 2        | 3        | This<br>study            |
| 446      | Belarus/447-55  | Republic of            | Minsk Region | 201      | female | 28  | +                     | 27      | 3        | 3        | 2        | 4        | 4        | 2        | 3        | This                     |

|     |                 |             |                |     |        |     |   |    |   |   |   |   |   |   |   |       |
|-----|-----------------|-------------|----------------|-----|--------|-----|---|----|---|---|---|---|---|---|---|-------|
| 9   |                 | Belarus     |                | 8   |        |     |   | 5  |   |   |   |   |   |   |   | study |
| 447 |                 | Republic of | Mogilev        | 201 |        |     | + |    |   |   |   |   |   |   |   | This  |
| 0   | Belarus/3-20    | Belarus     | Region         | 7   | female | 31  |   | 38 | 3 | 1 | 2 | 2 | 4 | 2 | 3 | study |
| 447 |                 | Republic of |                | 201 |        |     | + |    |   |   |   |   |   |   |   | This  |
| 1   | Belarus/5-44    | Belarus     | Vitebsk Region | 7   | male   | 24  |   | 38 | 3 | 1 | 2 | 2 | 4 | 2 | 3 | study |
| 447 |                 | Republic of |                | 201 |        |     | - |    |   |   |   |   |   |   |   | This  |
| 2   | Belarus/23-38   | Belarus     | Brest Region   | 8   | female | 27  |   | 38 | 3 | 1 | 2 | 2 | 4 | 2 | 3 | study |
| 447 |                 | Republic of | Mogilev        | 201 |        |     | + |    |   |   |   |   |   |   |   | This  |
| 3   | Belarus/17-40   | Belarus     | Region         | 8   | female | 27  |   | 4  | 3 | 1 | 1 | 2 | 4 | 2 | 3 | study |
| 447 |                 | Republic of |                | 201 |        |     | + |    |   |   |   |   |   |   |   | This  |
| 4   | Belarus/257-38  | Belarus     | Brest Region   | 8   | male   | 20  |   | 4  | 3 | 1 | 1 | 2 | 4 | 2 | 3 | study |
| 447 |                 | Republic of |                | 201 |        |     | + |    |   |   |   |   |   |   |   | This  |
| 5   | Belarus/67-38   | Belarus     | Brest Region   | 7   | female | 22  |   | 4  | 3 | 1 | 1 | 2 | 4 | 2 | 3 | study |
| 447 |                 | Republic of |                | 201 |        |     | - |    |   |   |   |   |   |   |   | This  |
| 6   | Belarus/586-75  | Belarus     | Minsk Region   | 8   | female | 22  |   | 4  | 3 | 1 | 1 | 2 | 4 | 2 | 3 | study |
| 447 |                 | Republic of | Mogilev        | 201 |        |     | + |    |   |   |   |   |   |   |   | This  |
| 7   | Belarus/8936-48 | Belarus     | Region         | 8   | female | 34  |   | 4  | 3 | 1 | 1 | 2 | 4 | 2 | 3 | study |
| 447 |                 | Republic of |                | 201 |        |     | + |    |   |   |   |   |   |   |   | This  |
| 8   | Belarus/4-78    | Belarus     | Minsk City     | 8   | female | 21  |   | 4  | 3 | 1 | 1 | 2 | 4 | 2 | 3 | study |
| 447 |                 | Republic of |                | 201 |        |     | - |    |   |   |   |   |   |   |   | This  |
| 9   | Belarus/8-38    | Belarus     | Brest Region   | 8   | female | 27  |   | 4  | 3 | 1 | 1 | 2 | 4 | 2 | 3 | study |
| 448 |                 | Republic of |                | 201 |        |     | - |    |   |   |   |   |   |   |   | This  |
| 0   | Belarus/46/1-38 | Belarus     | Brest Region   | 8   | female | 35  |   | 4  | 3 | 1 | 1 | 2 | 4 | 2 | 3 | study |
| 448 |                 | Republic of |                | 201 |        |     | - |    |   |   |   |   |   |   |   | This  |
| 1   | Belarus/13/1-38 | Belarus     | Brest Region   | 8   | female | 27  |   | 4  | 3 | 1 | 1 | 2 | 4 | 2 | 3 | study |
| 448 |                 | Republic of |                | 201 |        | N/A | + |    |   |   |   |   |   |   |   | This  |
| 2   | Belarus/191-38  | Belarus     | Brest Region   | 8   | male   | *   |   | 4  | 3 | 1 | 1 | 2 | 4 | 2 | 3 | study |
| 448 |                 | Republic of |                | 201 |        |     | + |    |   |   |   |   |   |   |   | This  |
| 3   | Belarus/4-38    | Belarus     | Brest Region   | 8   | female | 20  |   | 4  | 3 | 1 | 1 | 2 | 4 | 2 | 3 | study |
| 448 |                 | Republic of |                | 201 |        |     | - |    |   |   |   |   |   |   |   | This  |
| 4   | Belarus/4/2-38  | Belarus     | Brest Region   | 7   | female | 29  |   | 4  | 3 | 1 | 1 | 2 | 4 | 2 | 3 | study |
| 448 |                 | Republic of |                | 201 |        |     | + |    |   |   |   |   |   |   |   | This  |
| 5   | Belarus/14-38   | Belarus     | Brest Region   | 8   | female | 21  |   | 4  | 3 | 1 | 1 | 2 | 4 | 2 | 3 | study |

|     |                |                     |                |      |        |    |   |    |   |   |   |   |   |   |   |            |
|-----|----------------|---------------------|----------------|------|--------|----|---|----|---|---|---|---|---|---|---|------------|
| 448 | Belarus/45/1-6 | Republic of Belarus | Brest Region   | 2018 | female | 24 | - | 4  | 3 | 1 | 1 | 2 | 4 | 2 | 3 | This study |
| 448 | Belarus/9983-7 | Republic of Belarus | Mogilev Region | 2018 | female | 25 | + | 4  | 3 | 1 | 1 | 2 | 4 | 2 | 3 | This study |
| 448 | Belarus/53-37  | Republic of Belarus | Minsk Region   | 2018 | female | 22 | - | 4  | 3 | 1 | 1 | 2 | 4 | 2 | 3 | This study |
| 448 | Belarus/7-12   | Republic of Belarus | Minsk Region   | 2017 | female | 23 | + | 4  | 3 | 1 | 1 | 2 | 4 | 2 | 3 | This study |
| 449 | Belarus/11-72  | Republic of Belarus | Vitebsk Region | 2018 | female | 33 | + | 4  | 3 | 1 | 1 | 2 | 4 | 2 | 3 | This study |
| 449 | Belarus/13-72  | Republic of Belarus | Vitebsk Region | 2018 | female | 42 | + | 4  | 3 | 1 | 1 | 2 | 4 | 2 | 3 | This study |
| 449 | Belarus/14-72  | Republic of Belarus | Vitebsk Region | 2018 | female | 22 | + | 4  | 3 | 1 | 1 | 2 | 4 | 2 | 3 | This study |
| 449 | Belarus/7-80   | Republic of Belarus | Vitebsk Region | 2018 | female | 20 | + | 4  | 3 | 1 | 1 | 2 | 4 | 2 | 3 | This study |
| 449 | Belarus/3271   | Republic of Belarus | Grodno Region  | 2018 | male   | 34 | + | 4  | 3 | 1 | 1 | 2 | 4 | 2 | 3 | This study |
| 449 | Belarus/626-75 | Republic of Belarus | Minsk Region   | 2018 | female | 23 | - | 4  | 3 | 1 | 1 | 2 | 4 | 2 | 3 | This study |
| 449 | Belarus/155-68 | Republic of Belarus | Minsk Region   | 2018 | female | 22 | - | 4  | 3 | 1 | 1 | 2 | 4 | 2 | 3 | This study |
| 449 | Belarus/8-88   | Republic of Belarus | Mogilev Region | 2018 | female | 29 | - | 4  | 3 | 1 | 1 | 2 | 4 | 2 | 3 | This study |
| 449 | Belarus/347-38 | Republic of Belarus | Brest Region   | 2018 | female | 39 | - | 4  | 3 | 1 | 1 | 2 | 4 | 2 | 3 | This study |
| 449 | Belarus/8-38/2 | Republic of Belarus | Brest Region   | 2018 | female | 22 | - | 4  | 3 | 1 | 1 | 2 | 4 | 2 | 3 | This study |
| 450 | Belarus/154-38 | Republic of Belarus | Brest Region   | 2017 | female | 20 | + | 13 | 3 | 3 | 2 | 5 | 3 | 2 | 3 | This study |
| 450 | Belarus/39799  | Republic of Belarus | Gomel Region   | 2017 | female | 18 | - | 13 | 3 | 3 | 2 | 5 | 3 | 2 | 3 | This study |
| 450 | Belarus/3-38   | Republic of Belarus | Brest Region   | 2017 | female | 18 | + | 13 | 3 | 3 | 2 | 5 | 3 | 2 | 3 | This study |

|     |                 |                     |               |      |        |    |   |    |   |   |   |   |   |   |   |            |
|-----|-----------------|---------------------|---------------|------|--------|----|---|----|---|---|---|---|---|---|---|------------|
| 2   |                 | Belarus             |               | 8    |        |    |   |    |   |   |   |   |   |   |   | study      |
| 450 | Belarus/54/1-38 | Republic of Belarus | Brest Region  | 2018 | female | 24 | - | 13 | 3 | 3 | 2 | 5 | 3 | 2 | 3 | This study |
| 450 | Belarus/98-38   | Republic of Belarus | Brest Region  | 2018 | female | 28 | - | 13 | 3 | 3 | 2 | 5 | 3 | 2 | 3 | This study |
| 450 | Belarus/9-88    | Republic of Belarus | Minsk city    | 2018 | female | 21 | + | 13 | 3 | 3 | 2 | 5 | 3 | 2 | 3 | This study |
| 450 | Belarus/1268    | Republic of Belarus | Minsk Region  | 2017 | female | 23 | - | 13 | 3 | 3 | 2 | 5 | 3 | 2 | 3 | This study |
| 450 | Belarus/160-38  | Republic of Belarus | Brest Region  | 2018 | female | 22 | + | 13 | 3 | 3 | 2 | 5 | 3 | 2 | 3 | This study |
| 450 | Belarus/37-38   | Republic of Belarus | Brest Region  | 2018 | female | 19 | - | 13 | 3 | 3 | 2 | 5 | 3 | 2 | 3 | This study |
| 450 | Belarus/449     | Republic of Belarus | Minsk Region  | 2017 | female | 23 | + | 13 | 3 | 3 | 2 | 5 | 3 | 2 | 3 | This study |
| 451 | Belarus/14-10   | Republic of Belarus | Minsk city    | 2017 | female | 29 | + | 9  | 3 | 3 | 2 | 4 | 3 | 2 | 3 | This study |
| 451 | Belarus/6-28    | Republic of Belarus | Grodno Region | 2018 | female | 24 | + | 9  | 3 | 3 | 2 | 4 | 3 | 2 | 3 | This study |
| 451 | Belarus/5-61    | Republic of Belarus | Grodno Region | 2018 | female | 24 | + | 9  | 3 | 3 | 2 | 4 | 3 | 2 | 3 | This study |
| 451 | Belarus/7-38    | Republic of Belarus | Brest Region  | 2018 | female | 25 | - | 9  | 3 | 3 | 2 | 4 | 3 | 2 | 3 | This study |
| 451 | Belarus/50-38   | Republic of Belarus | Brest Region  | 2018 | female | 25 | - | 9  | 3 | 3 | 2 | 4 | 3 | 2 | 3 | This study |
| 451 | Belarus/43/2-38 | Republic of Belarus | Brest Region  | 2018 | female | 24 | - | 9  | 3 | 3 | 2 | 4 | 3 | 2 | 3 | This study |
| 451 | Belarus/1/2-38  | Republic of Belarus | Brest Region  | 2017 | female | 40 | - | 9  | 3 | 3 | 2 | 4 | 3 | 2 | 3 | This study |
| 451 | Belarus/5-29    | Republic of Belarus | Grodno Region | 2018 | male   | 23 | + | 9  | 3 | 3 | 2 | 4 | 3 | 2 | 3 | This study |
| 451 | Belarus/40-38   | Republic of Belarus | Brest Region  | 2018 | female | 29 | - | 9  | 3 | 3 | 2 | 4 | 3 | 2 | 3 | This study |

|     |               |             |              |     |        |     |     |           |   |   |    |   |   |   |   |             |
|-----|---------------|-------------|--------------|-----|--------|-----|-----|-----------|---|---|----|---|---|---|---|-------------|
| 451 |               | Republic of |              | 201 |        |     | +   |           |   |   |    |   |   |   |   | This        |
| 9   | Belarus/8-12  | Belarus     | Minsk Region | 7   | female | 23  |     | <b>9</b>  | 3 | 3 | 2  | 4 | 3 | 2 | 3 | study       |
| 452 |               | Republic of | Grodno       | 201 |        |     | +   |           |   |   |    |   |   |   |   | This        |
| 0   | Belarus/737   | Belarus     | Region       | 8   | male   | 35  |     | <b>9</b>  | 3 | 3 | 2  | 4 | 3 | 2 | 3 | study       |
| 452 |               | Republic of | Mogilev      | 201 |        |     | +   |           |   |   |    |   |   |   |   | This        |
| 1   | Belarus/7-20  | Belarus     | Region       | 7   | female | 27  |     | <b>6</b>  | 3 | 3 | 2  | 5 | 3 | 1 | 3 | study       |
| 452 |               | Republic of |              | 201 |        |     | -   |           |   |   |    |   |   |   |   | This        |
| 2   | Belarus/1552  | Belarus     | Gomel Region | 8   | female | 24  |     | <b>6</b>  | 3 | 3 | 2  | 5 | 3 | 1 | 3 | study       |
| 452 |               | Republic of |              | 201 |        |     | -   |           |   |   |    |   |   |   |   | This        |
| 3   | Belarus/4610  | Belarus     | Gomel Region | 8   | female | 24  |     | <b>6</b>  | 3 | 3 | 2  | 5 | 3 | 1 | 3 | study       |
| 452 |               | Republic of |              | 201 |        |     | +   |           |   |   |    |   |   |   |   | This        |
| 4   | Belarus/14-88 | Belarus     | Minsk city   | 8   | female | 22  |     | <b>6</b>  | 3 | 3 | 2  | 5 | 3 | 1 | 3 | study       |
| 452 |               | Republic of |              | 201 |        |     | +   |           |   |   |    |   |   |   |   | This        |
| 5   | Belarus/9-78  | Belarus     | Minsk city   | 8   | female | 30  |     | <b>95</b> | 3 | 3 | 28 | 5 | 3 | 2 | 3 | study       |
| 452 |               | Republic of |              | 201 |        |     | -   | <b>11</b> |   |   |    |   |   |   |   | This        |
| 6   | Belarus/10-38 | Belarus     | Brest Region | 8   | female | 20  |     | <b>0</b>  | 3 | 1 | 1  | 2 | 3 | 2 | 3 | study       |
|     |               |             |              | 200 |        |     | N/A |           |   |   |    |   |   |   |   |             |
| 240 | F/SW5         | Sweden      | N/A          | 2   | female | N/A |     | <b>38</b> | 3 | 1 | 2  | 2 | 4 | 2 | 3 | [36]        |
| 7   | D/IC-Cal-8    | N/A         | N/A          | N/A | N/A    | N/A | N/A | <b>4</b>  | 3 | 1 | 1  | 2 | 4 | 2 | 3 | [3]         |
|     |               |             |              | 196 |        |     | N/A |           |   |   |    |   |   |   |   |             |
| 215 | D/UW-3/CX     | USA         | Seattle      | 5   | female | N/A |     | <b>13</b> | 3 | 3 | 2  | 5 | 3 | 2 | 3 | [3, 36, 37] |
| 17  | J/UW-36       | N/A         | N/A          | N/A | N/A    | N/A | N/A | <b>9</b>  | 3 | 3 | 2  | 4 | 3 | 2 | 3 | [3]         |
|     |               |             |              | 197 |        |     | N/A |           |   |   |    |   |   |   |   |             |
| 14  | K/UW-31       | USA         | Washington   | 3   | female | N/A |     | <b>6</b>  | 3 | 3 | 2  | 5 | 3 | 1 | 3 | [3]         |
|     |               |             |              | 200 |        |     | N/A |           |   |   |    |   |   |   |   |             |
| 567 | G_Soton57     | UK          | N/A          | 9   | female | N/A |     | <b>95</b> | 3 | 3 | 28 | 5 | 3 | 2 | 3 | [38]        |
|     |               |             |              | 201 |        |     | N/A | <b>11</b> |   |   |    |   |   |   |   |             |
| 646 | F_S4410       | Sweden      | N/A          | 0   | female | N/A |     | <b>0</b>  | 3 | 1 | 1  | 2 | 3 | 2 | 3 | [38]        |

\* N/A - Not Available. Changed alleles in the Belarus CT strains in comparison with the relevant ancestors are marked in red. \*\* - Presence symptoms of typical complaints for genital chlamydial infection [33] or absence (the asymptomatic chlamydia patient).

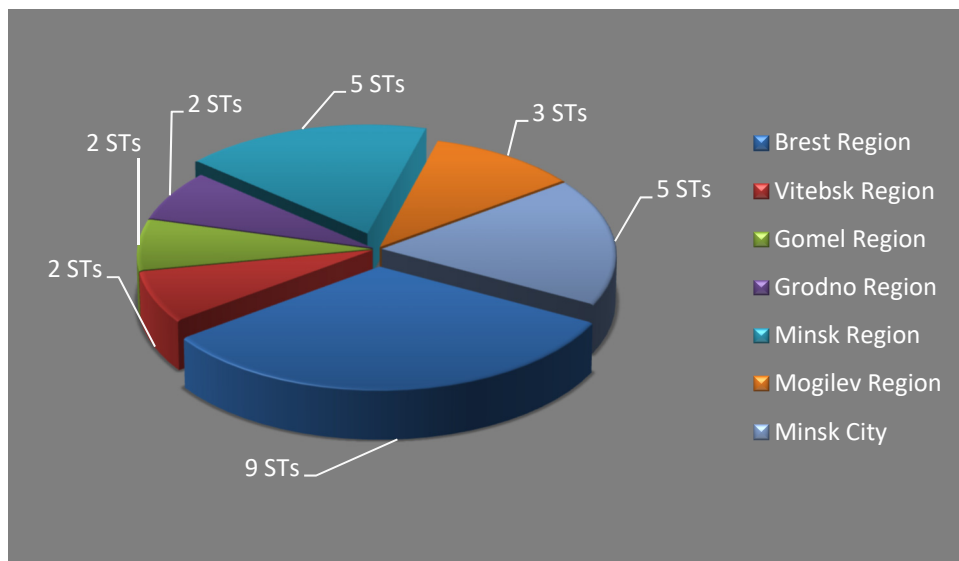

**Figure S1.** The number of CT STs identified with MLST in seven main Regions of the Republic of Belarus in 2017-2018.

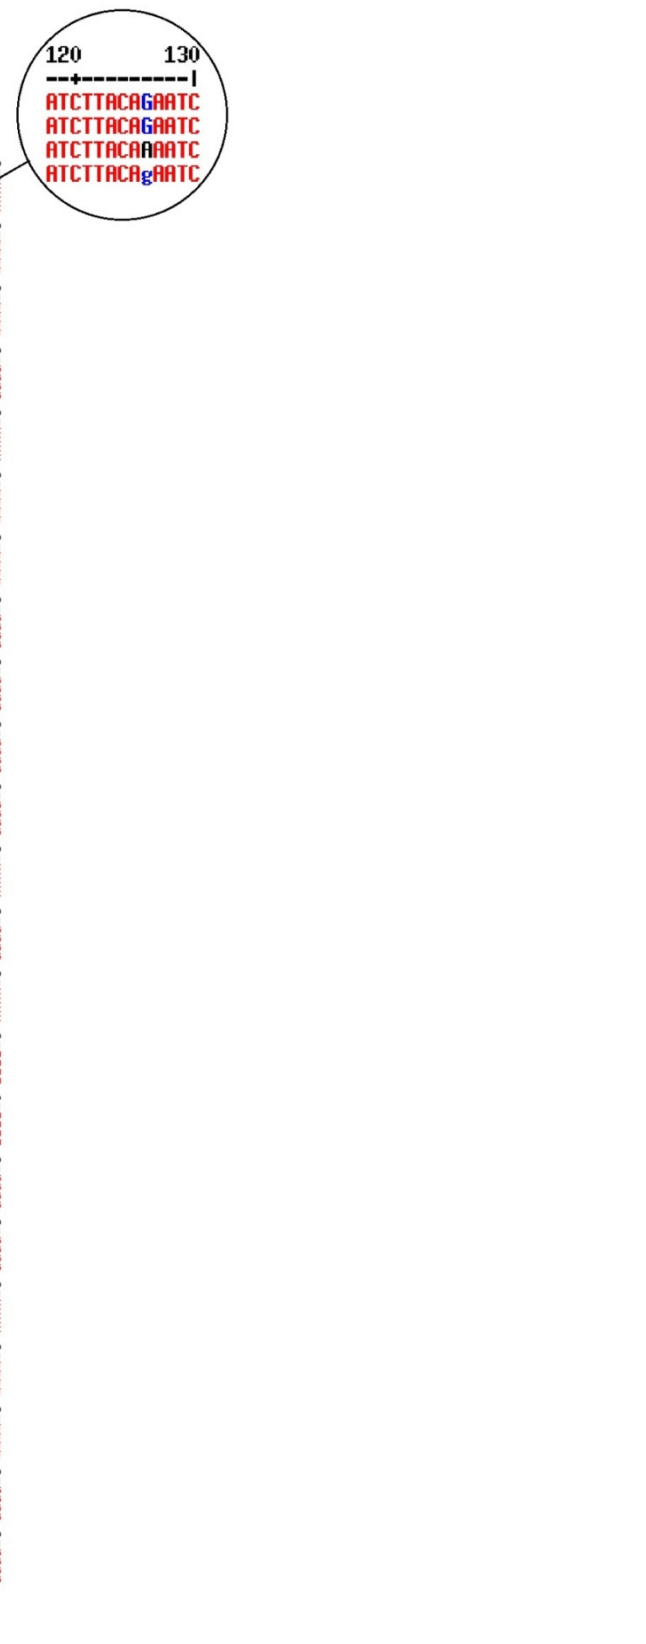

Supplement: s1 [file s1]
